# Supplementary material for: The Profile of Belgian Osteopaths: A Cross-Sectional Survey
Source: MDPI journal article supplement (doi:10.3390/healthcare10112136), 2022-10-27
Supplement: s1 [file s1]

**Table S2:** Other professional activities.

| Activity                                                           | n  | %    |
|--------------------------------------------------------------------|----|------|
| clinical physician                                                 | 2  | 1.3  |
| clinical physiotherapist                                           | 31 | 20.8 |
| other healthcare practitioner                                      | 8  | 5.4  |
| lecturing osteopathic courses in learning                          | 38 | 25.5 |
| supervising osteopathic clinical trainees                          | 17 | 11.4 |
| supervising osteopathic research dissertations                     | 19 | 12.8 |
| researcher                                                         | 8  | 5.4  |
| work for a professional osteopathic regulatory body or association | 4  | 2.7  |
| other professional activities                                      | 22 | 14.8 |
