# Supplementary material for: The Profile of Belgian Osteopaths: A Cross-Sectional Survey
Source: MDPI journal article supplement (doi:10.3390/healthcare10112136), 2022-10-27
Supplement: s1 [file s1]

**Table S3:** Osteopathic training and life-long learning characteristics (n= 332).

| <b>Descriptor</b>                                 | <b>Variable</b>               | <b>n</b> | <b>%</b> |
|---------------------------------------------------|-------------------------------|----------|----------|
| <b>Type of training</b>                           | Part-time                     | 216      | 65.1     |
|                                                   | Full-time                     | 116      | 34.9     |
| <b>Duration of the training</b>                   | 3 years                       | 19       | 5.7      |
|                                                   | 4 years                       | 58       | 17.5     |
|                                                   | 5 years                       | 149      | 44.9     |
|                                                   | 6 years                       | 83       | 25.0     |
|                                                   | >6 years                      | 23       | 6.9      |
| <b>Type of osteopathic academic qualification</b> | Diploma Osteopathy (DO)       | 218      | 65.7     |
|                                                   | Bachelor (Graduate)           | 51       | 15.4     |
|                                                   | Master                        | 56       | 16.9     |
|                                                   | PhD                           | 6        | 1.8      |
| <b>Continuous Professional Development (CPD)</b>  | Yes                           | 295      | 88.9     |
|                                                   | No                            | 37       | 11.1     |
| <b>Previous qualification(s)</b>                  | Chiropractor                  | 0        | 0.0      |
|                                                   | Massage therapist             | 3        | 0.8      |
|                                                   | Physician                     | 4        | 1.1      |
|                                                   | Midwife                       | 0        | 0.0      |
|                                                   | Nurse                         | 1        | 0.3      |
|                                                   | Physiotherapist               | 239      | 65.8     |
|                                                   | Sport scientist               | 20       | 5.5      |
|                                                   | Other healthcare training     | 12       | 3.3      |
|                                                   | Other non-healthcare training | 11       | 3.0      |
|                                                   | No prior training             | 73       | 20.1     |
