# Supplementary material for: The Profile of Belgian Osteopaths: A Cross-Sectional Survey
Source: MDPI journal article supplement (doi:10.3390/healthcare10112136), 2022-10-27
Supplement: s1 [file s1]

**Table S4:** Osteopath identity statements.

| Statement                                               | strongly disagree | disagree | neither agree or disagree | agree     | strongly agree |
|---------------------------------------------------------|-------------------|----------|---------------------------|-----------|----------------|
| I strongly define myself as an osteopath.               | 0.3 (1)           | 1.2 (4)  | 3.9 (13)                  | 16.0 (53) | 78.6 (261)     |
| Being an osteopath is important to me.                  | 0.3 (1)           | 0.6 (2)  | 4.8 (16)                  | 19.9 (66) | 74.4 (247)     |
| I'm proud to be an osteopath.                           | 0.3 (1)           | 0.6 (2)  | 5.1 (17)                  | 18.4 (61) | 75.6 (251)     |
| I strongly define myself as a health care practitioner. | 2.4 (8)           | 0.9 (3)  | 4.8 (16)                  | 21.4 (71) | 70.5 (234)     |
| Being a healthcare practitioner is important to me.     | 2.1 (7)           | 1.2 (4)  | 3.6 (12)                  | 24.7 (82) | 68.4 (227)     |
| Numbers in table are % (n)                              |                   |          |                           |           |                |
