# Supplementary material for: The Profile of Belgian Osteopaths: A Cross-Sectional Survey
Source: MDPI journal article supplement (doi:10.3390/healthcare10112136), 2022-10-27
Supplement: s1 [file s1]

**Table S5:** Views as an osteopath statements.

| Statement                                                                                                                 | strongly disagree | disagree     | neither agree or disagree | agree         | strongly agree |
|---------------------------------------------------------------------------------------------------------------------------|-------------------|--------------|---------------------------|---------------|----------------|
| Medical professionals (physicians, physiotherapists, etc.) in Belgium see osteopathy as a distinct healthcare discipline. | 1.2<br>(4)        | 12.1<br>(40) | 19.3<br>(64)              | 42.5<br>(141) | 25.0<br>(83)   |
| Overall the quality of patient care provided by osteopaths in Belgium is good.                                            | 0.0<br>(0)        | 2.1<br>(7)   | 9.9<br>(33)               | 62.1<br>(206) | 25.9<br>(86)   |
| Osteopathy should be regulated by law as an independent profession in Belgium.                                            | 1.2<br>(4)        | 1.8<br>(6)   | 7.8<br>(26)               | 19.6<br>(65)  | 69.6<br>(231)  |
| Regulation would have a positive effect on how osteopaths practice.                                                       | 2.4<br>(8)        | 4.8<br>(16)  | 19.6<br>(65)              | 23.2<br>(77)  | 50.0<br>(166)  |

|                                                                                                                                    |               |              |               |               |               |
|------------------------------------------------------------------------------------------------------------------------------------|---------------|--------------|---------------|---------------|---------------|
| Patients should be better reimbursed for osteopathic care in Belgium.                                                              | 0.3<br>(1)    | 2.1<br>(7)   | 9.6<br>(32)   | 23.2<br>(77)  | 64.8<br>(215) |
| Medical professionals (physicians, physiotherapists, etc.) in Belgium see osteopathy as a subgroup of reimbursable manual therapy. | 6.9<br>(23)   | 17.8<br>(59) | 34.3<br>(114) | 29.2<br>(97)  | 11.8<br>(39)  |
| Osteopaths in Belgium would like to have better cooperation with other healthcare professionals.                                   | 0.3<br>(1)    | 2.1<br>(7)   | 8.1<br>(27)   | 36.1<br>(120) | 53.3<br>(177) |
| Osteopathy in Belgium should be regulated as first line medical practice.                                                          | 1.2<br>(4)    | 1.2<br>(4)   | 8.7<br>(29)   | 18.7<br>(62)  | 70.2<br>(233) |
| Osteopathy in Belgium should be regulated as an allied health profession (e.g. physiotherapy or occupational therapy).             | 53.3<br>(177) | 14.2<br>(47) | 13.9<br>(46)  | 10.5<br>(35)  | 8.1<br>(27)   |
| Numbers in table are % (n)                                                                                                         |               |              |               |               |               |
