# Supplementary material for: The Profile of Belgian Osteopaths: A Cross-Sectional Survey
Source: MDPI journal article supplement (doi:10.3390/healthcare10112136), 2022-10-27
Supplement: s1 [file s1]

**Table S1:** Geographical distribution by province and membership in a professional osteopathic association (n=332).

| Variable                                     | n   | %    |
|----------------------------------------------|-----|------|
| <b>Geographical distribution by province</b> |     |      |
| Antwerpen                                    | 55  | 16.6 |
| Brussels                                     | 43  | 13.0 |
| Vlaams Brabant                               | 20  | 6.0  |
| Brabant Wallon                               | 32  | 9.6  |
| Hainaut                                      | 34  | 10.2 |
| Limburg                                      | 15  | 4.5  |
| Liège                                        | 27  | 8.1  |
| Luxembourg                                   | 6   | 1.8  |
| Namur                                        | 16  | 4.8  |
| West-Vlaanderen                              | 44  | 13.3 |
| Oost-Vlaanderen                              | 40  | 12.1 |
| <b>Professional osteopathic association</b>  |     |      |
| Yes                                          | 324 | 97.6 |
| No                                           | 8   | 2.4  |
| <b>Association</b>                           |     |      |
| BUO/UBO                                      | 28  | 8.5  |
| BVBO/UPOB                                    | 248 | 74.9 |
| UKO                                          | 26  | 7.9  |
| UPMO                                         | 28  | 8.5  |
| ALDO                                         | 1   | 0.3  |
